# Supplementary material for: Improved Glycaemic Control and Nephroprotective Effects of Empagliflozin and Paricalcitol Co-Therapy in Mice with Type 2 Diabetes Mellitus
Source: MDPI journal article supplement (doi:10.3390/ijms242417380), 2023-12-12
Supplement: s1 [file s1]

**Supplementary Table S1:** The sequences of PCR primers used for the detection of mouse *GAPDH*, *TGF- $\beta$ 1*, iNOS (*NOS2*), NGAL (*Lcn2*), KIM-1 (*Havcr1*), *PPAR $\alpha$*  (*PPARA*), *PPAR $\gamma$*  (*PPARG*), and *SREBP1* (*Srebf1*) mRNAs in renal samples including the corresponding genes accession numbers and amplicon sizes.

| Genes                                               | Forward                             | Reverse                           | Amplicon size |
|-----------------------------------------------------|-------------------------------------|-----------------------------------|---------------|
| <b><i>GAPDH</i></b><br>(NCBI: NM_001289726.1)       | 5' CAG GAG AGT GTT TCC TCG TCC 3'   | 5' TTT GCC GTG AGT GGA GTC AT 3'  | 190 bp        |
| <b><i>TGF<math>\beta</math>1</i></b><br>NM_011577.2 | 5' GCC CGA AGC GGA CTA CTA TG 3'    | 5' GCT TCC CGA ATG TCT GAC GTA 3' | 135 bp        |
| <b><i>NOS2</i></b><br>NM_010927.4                   | 5' CCA CCT TGG TGA AGG GAC TG 3'    | 5' AGA AAC TTC CAG GGG CAA GC 3'  | 165 bp        |
| <b><i>Lcn2</i></b><br>(NCBI: NM_008491.1)           | 5' AGC TTT ACG ATG TAC AGC ACC A 3' | 5' TCT GAT CCA GTA GCG ACA GC 3'  | 108 bp        |
| <b><i>Havcr1</i></b><br>(NCBI: NM_134248.2)         | 5' TGT CCC CAT GAG ACA ACA GC 3'    | 5' GTT TTT CTG CGG CTT CCC TG 3'  | 138 bp        |
| <b><i>PPARA</i></b><br>NM_011144.6                  | 5' CCG AAC ATT GGT GTT CGC AG 3'    | 5' AGA TAC GCC CAA ATG CAC CA 3'  | 161 bp        |
| <b><i>PPARG</i></b><br>NM_001127330.2               | 5' GTG AGA CCA ACA GCC TGA CG 3'    | 5' TCA GTG GTT CAC CGC TTC TTT 3' | 110 bp        |
| <b><i>Srebf1</i></b><br>NM_011480.4                 | 5' CAT GAA ACC CGA AGT GGT GGA 3'   | 5' CGG GCT CAG AGT CAC TAC CA 3'  | 125 bp        |
